# Supplementary material for: Enhancing the solubility of Mn in AgSbSe2 for high thermoelectric performance through entropy engineering
Source: Royal Society of Chemistry journal article supplement (doi:10.1039/d3ta01778h), 2023-01-01
Supplement: d3ta01778h1.pdf [file d3ta01778h1.pdf]

## Supporting Information

### **Enhancing the solubility of Mn in AgSbSe<sub>2</sub> for high thermoelectric performance through entropy engineering**

Zheng Ma, Yubo Luo\*, Wang Li, Chengjun Li, Yingchao Wei, Abubakar-Yakubu Haruna, Zhihong Zhang, Xin Li, Qinghui Jiang and Junyou Yang\*

State Key Laboratory of Materials Processing and Die & Mould Technology  
School of Materials Science and Engineering  
Huazhong University of Science and Technology  
Wuhan, 430074 P. R. China.

\* Corresponding author.

Email: luoyubo@hust.edu.cn (Y. Luo); jyyang@mail.hust.edu.cn (J. Yang)

## Results and Discussion :

### 1. Lorenz number calculation based on the single parabolic band

In our work, the Lorenz number is obtained based on the single parabolic band:

$$L = \left( \frac{\kappa_B}{e} \right)^2 \left[ \frac{\left( r + \frac{7}{2} \right) F_{r+\frac{5}{2}}(\eta)}{\left( r + \frac{3}{2} \right) F_{r+\frac{1}{2}}(\eta)} - \left( \frac{\left( r + \frac{5}{2} \right) F_{r+\frac{3}{2}}(\eta)}{\left( r + \frac{3}{2} \right) F_{r+\frac{1}{2}}(\eta)} \right)^2 \right], \quad (1)$$

In the equations above the integral  $F_n(\eta)$  is defined by

$$F_n(\eta) = \int_0^\infty \frac{\chi^n}{1 + e^{\chi - \eta}} d\chi, \quad (2)$$

$$\eta = \frac{E_f}{k_B T}, \quad (3)$$

Where  $F_n(\eta)$  is the Fermi integral function of order  $n$ , and  $\eta$  is called the reduced Fermi energy.  $\eta$  can be obtained by the following formula:

$$S = \pm \frac{k_B}{e} \left( \frac{\left( r + \frac{5}{2} \right) F_{r+\frac{3}{2}}(\eta)}{\left( r + \frac{3}{2} \right) F_{r+\frac{1}{2}}(\eta)} - \eta \right) \quad (3)$$

Using the tested Seebeck coefficients, solve the above equation to get  $\eta$ . The scattering factor  $r$  is  $-\frac{1}{2}$  in acoustic phonon scattering.

The average sound velocities ( $V_a$ ) were calculated based on:

$$V_a = \left[ \frac{1}{3} \left( \frac{2}{V_T^3} + \frac{1}{V_l^3} \right) \right]^{\frac{1}{3}}$$

## 2. Figures

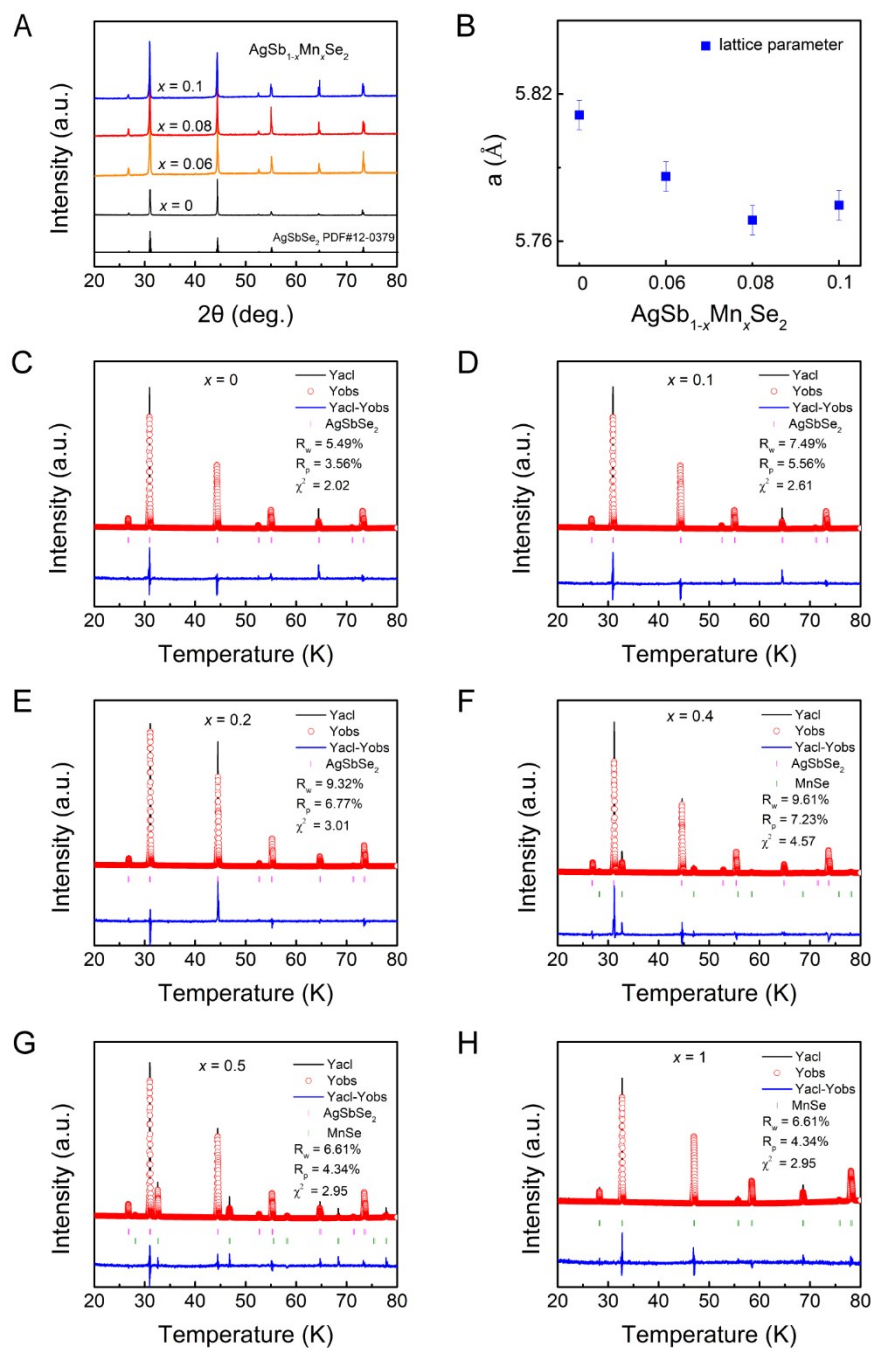

**Figure S1.** (A) Powder XRD patterns, (B) lattice parameters of  $\text{AgSb}_{1-x}\text{Mn}_x\text{Se}_2$  ( $x = 0, 0.06, 0.08, 0.1$ ) at room temperature. (C) - (H) Rietveld refinement result using X-ray diffraction data for  $(\text{AgSbSe}_2)_{1-x}(\text{MnSe})_x$  ( $x = 0, 0.1, 0.2, 0.4, 0.5, 1$ ).

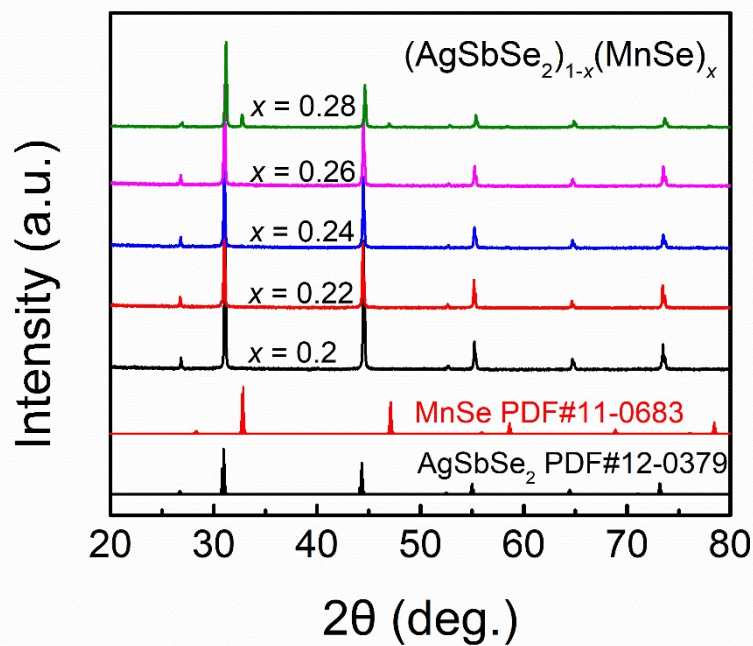

**Figure S2.** Powder XRD patterns for  $(\text{AgSbSe}_2)_{1-x}(\text{MnSe})_x$  ( $x = 0.2, 0.24, 0.26, 0.28$ ).

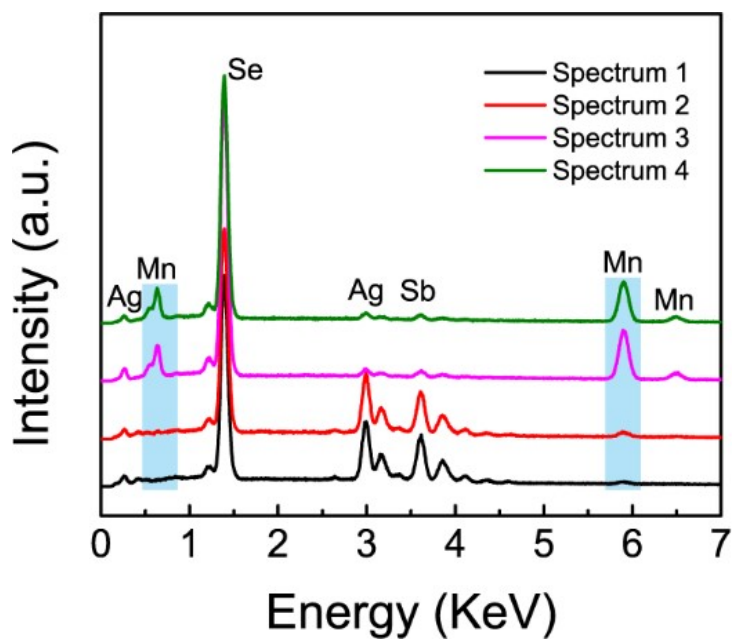

**Figure S3.** Wavelength dispersion spectrometer (WDS) images of elemental Ag, Mn, Sb and Se corresponding to panel C in Figure 2B.

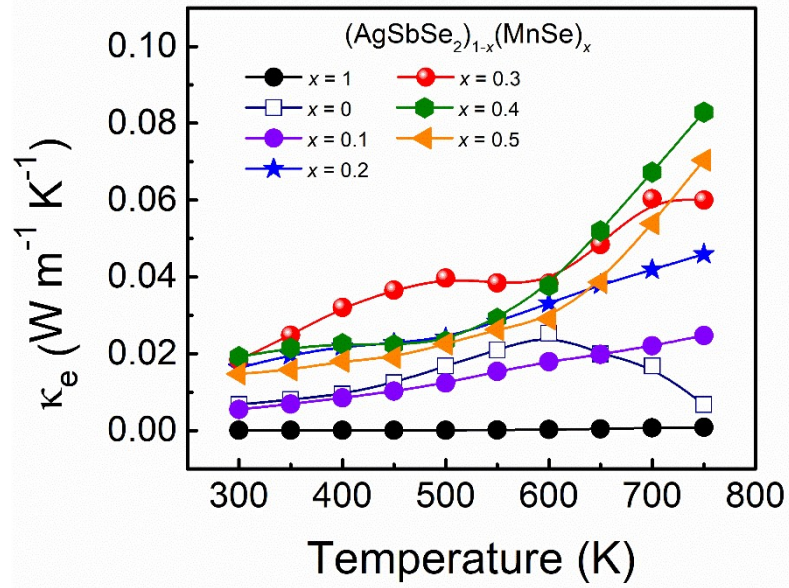

**Figure S4.** Electronic thermal conductivities as functions of temperature for  $(\text{AgSbSe}_2)_{1-x}(\text{MnSe})_x$  ( $x = 0, 0.1, 0.2, 0.3, 0.4, 0.5$ ).

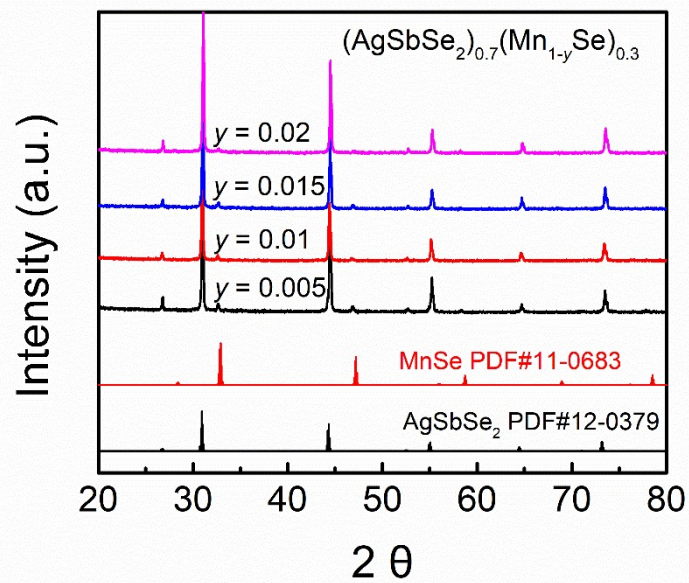

**Figure S5.** Powder XRD patterns for  $(\text{AgSbSe}_2)_{0.7}(\text{Mn}_{1-y}\text{Se})_{0.3}$  ( $y = 0.005, 0.01, 0.015, 0.02$ ).

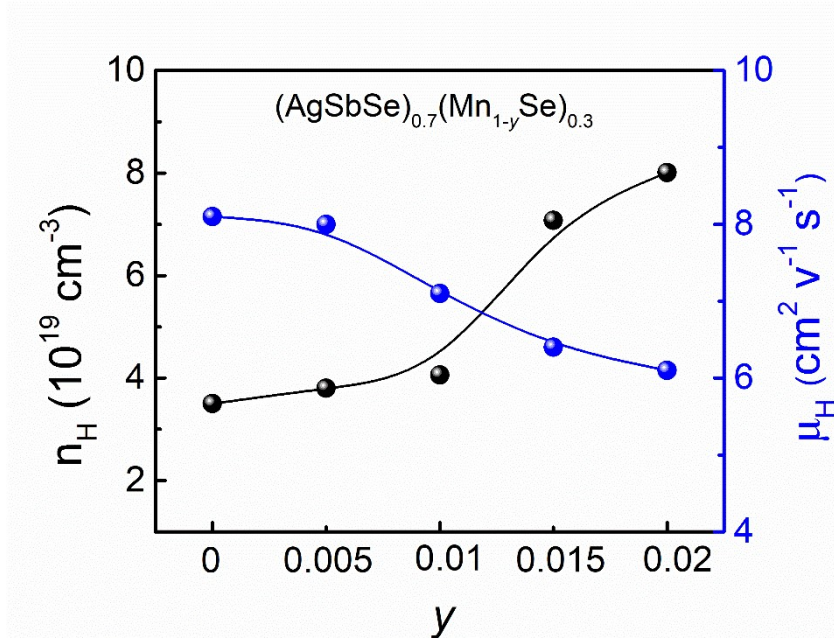

**Figure S6.** The Hall carrier concentration and Hall mobility of  $(\text{AgSbSe}_2)_{0.7}(\text{Mn}_{1-y}\text{Se})_{0.3}$  ( $y = 0.005, 0.01, 0.015, 0.02$ ) at room temperature.

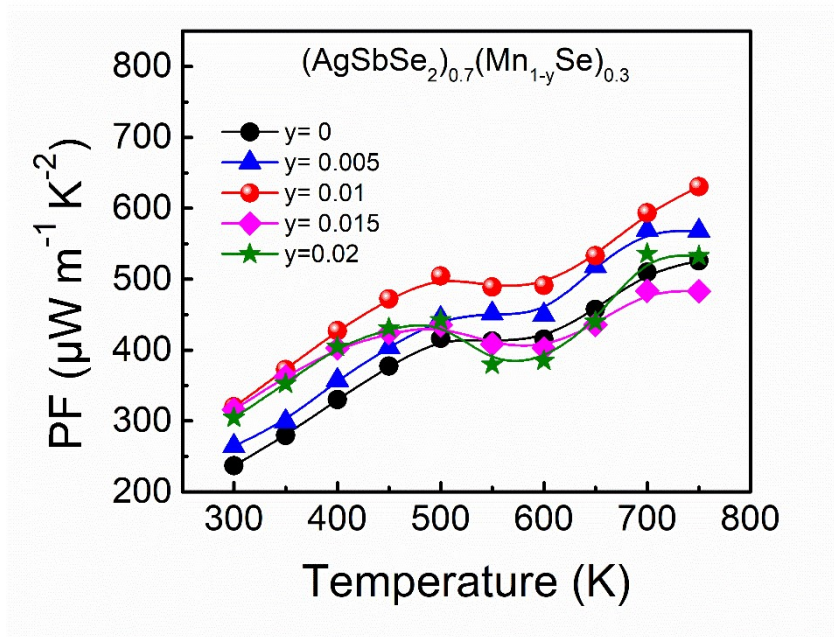

**Figure S7.** Power factors as a function of temperature for  $(\text{AgSbSe}_2)_{0.7}(\text{Mn}_{1-y}\text{Se})_{0.3}$  ( $y = 0.005, 0.01, 0.015, 0.02$ ).

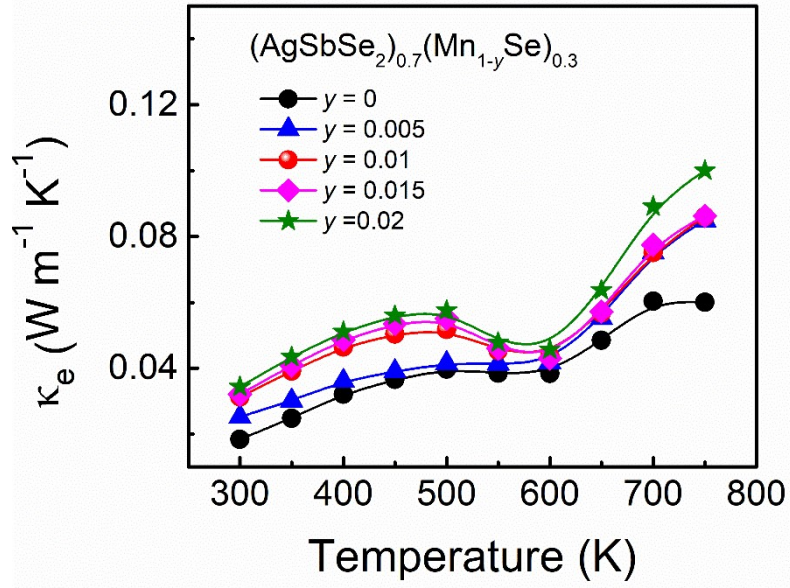

**Figure S8.** Electronic thermal conductivities as functions of temperature for  $(\text{AgSbSe}_2)_{0.7}(\text{Mn}_{1-y}\text{Se})_{0.3}$  ( $y = 0.005, 0.01, 0.015, 0.02$ ).

### 3. Table

**Table S1.** Density  $\rho$  of  $(\text{AgSbSe}_2)_{1-x}(\text{MnSe})_x$  ( $x = 0, 0.1, 0.2, 0.3, 0.4, 0.5$ ) and  $(\text{AgSbSe}_2)_{0.7}(\text{Mn}_{1-y}\text{Se})_{0.3}$  ( $y = 0.005, 0.01, 0.015, 0.02$ ) at room temperature

| Sample              | $\rho$ (g cm <sup>-3</sup> ) |
|---------------------|------------------------------|
| AgSbSe <sub>2</sub> | 6.35                         |
| MnSe                | 5.51                         |
| x = 0.1             | 6.26                         |
| x = 0.2             | 6.17                         |
| x = 0.3             | 6.10                         |
| x = 0.4             | 6.02                         |
| x = 0.5             | 6.00                         |
| y = 0.005           | 6.01                         |
| y = 0.01            | 6.05                         |
| y = 0.015           | 6.04                         |

$y = 0.02$

6.03
